# Supplementary material for: Plasma enhanced anti-coking performance of Pd/CeO2 catalysts for the conversion of methane
Source: Royal Society of Chemistry journal article supplement (doi:10.1039/d1se01441b), 2021-11-10
Supplement: d1se01441b1.pdf [file d1se01441b1.pdf]

Supplementary information for

**Plasma enhanced anti-coking performance of Pd/CeO<sub>2</sub>  
catalysts for conversion of methane**

Xiucui Hu,<sup>a</sup> Yadi Liu,<sup>a</sup> Liguang Dou,<sup>a</sup> Cheng Zhang,<sup>a, b</sup> Shuai Zhang,<sup>a, b</sup> Yuan Gao,<sup>a</sup> Xin  
Tu<sup>c</sup> and Tao Shao<sup>a, b \*</sup>

<sup>a</sup> Beijing International S&T Cooperation Base for Plasma Science and Energy  
Conversion, Institute of Electrical Engineering, Chinese Academy of Sciences, Beijing  
100190, China

<sup>b</sup> University of Chinese Academy of Sciences, Beijing 100049, China

<sup>c</sup> Department of Electrical Engineering and Electronics, University of Liverpool,  
Liverpool L69 3GJ, United Kingdom

\* Corresponding author: st@mail.iee.ac.cn

## 1. Experimental

### 1.1 Synthesis of catalysts

CeO<sub>2</sub> supports were synthesized by the reported hydrothermal method.<sup>1</sup> The solution of NaOH (14.4 g, Macklin, 40 mL) and the solution of Ce(NO<sub>3</sub>)<sub>2</sub>·6H<sub>2</sub>O (1.3 g, Macklin, 20 mL) were mixed and stirred for 30 min. Subsequently, the mixed solution was transferred to Teflon-lined stainless-steel autoclaves and heated at 100 °C for 24 h. The precipitates were washed, dried and calcined at 400 °C for 4 h.

The Pd/CeO<sub>2</sub> catalysts were synthesized via a similar deposition-precipitation method.<sup>2</sup> Typically, appropriate volume of the PdCl<sub>2</sub> aqueous solution (1.0 mg mL<sup>-1</sup>, Macklin) was added into the aqueous solution including the CeO<sub>2</sub> supports (0.6 g). The pH value was adjusted to ca. 8 by adding a certain volume of NaOH solution (0.2 mol L<sup>-1</sup>, Macklin). The solids were collected by filtration, dried and calcined in flowing air at 980 °C for 2 h. In this work, the catalysts were denoted as xPd/CeO<sub>2</sub>, where *x* is the weight percentage of palladium in ceria.

### 1.2 Catalytic tests

Methane conversion (*C*<sub>CH<sub>4</sub></sub>), hydrocarbon products selectivity (*S*<sub>C<sub>x</sub>H<sub>y</sub></sub>) and yields (*Y*<sub>C<sub>x</sub>H<sub>y</sub></sub>), H<sub>2</sub> selectivity (*S*<sub>H<sub>2</sub></sub>) and yield (*Y*<sub>H<sub>2</sub></sub>), carbon balances (*B*<sub>C</sub>) and hydrogen balances (*B*<sub>H</sub>) were calculated according to the following the equations<sup>3</sup>.

$$C_{CH_4} (\%) = \frac{\text{moles of CH}_4 \text{ converted}}{\text{moles of initial CH}_4} \times 100 \quad (1)$$

$$S_{C_xH_y} (\%) = \frac{x \times \text{moles of C}_x\text{H}_y \text{ produced}}{\text{moles of CH}_4 \text{ converted}} \times 100 \quad (2)$$

$$S_{H_2} (\%) = \frac{\text{moles of H}_2 \text{ produced}}{2 \times \text{moles of CH}_4 \text{ converted}} \times 100 \quad (3)$$

$$Y_{C_xH_y} (\%) = C_{CH_4} \times S_{C_xH_y} \times 100 \quad (4)$$

$$Y_{H_2} (\%) = C_{CH_4} \times S_{H_2} \times 100 \quad (5)$$

$$B_C (\%) = \frac{\text{moles of CH}_4 \text{ unconverted} + \sum_{x=2, 3, 4} x \times \text{moles of C}_x\text{H}_y \text{ produced}}{\text{moles of initial CH}_4} \times 100 \quad (6)$$

$$B_H (\%) = \frac{4 \times \text{moles of CH}_4 \text{ unconverted} + 2 \times \text{moles of H}_2 \text{ produced} + \sum_{y=2, 4, 6, 10} x \times \text{moles of C}_x\text{H}_y \text{ produced}}{4 \times \text{moles of initial CH}_4} \times 100 \quad (7)$$

where the selectivity of  $C_xH_y$  product was determined on the basis of carbon balance.

The energy consumption (EC) of the discharge were calculated as follows<sup>4</sup>.

$$EC \text{ (J mmol}^{-1}\text{)} = \frac{P \text{ (J/s)}}{\text{rate of H}_2 \text{ produced (mmol/s)} + \text{rate of C}_x\text{H}_y \text{ produced (mmol/s)}} \quad (8)$$

The discharge power (P) was calculated by the waveforms of discharge voltage and discharge current. Here, we think the external power of the furnace to be the same under the same discharge conditions and constant temperature. Thus, in our work, only the discharge power of the plasma was considered.

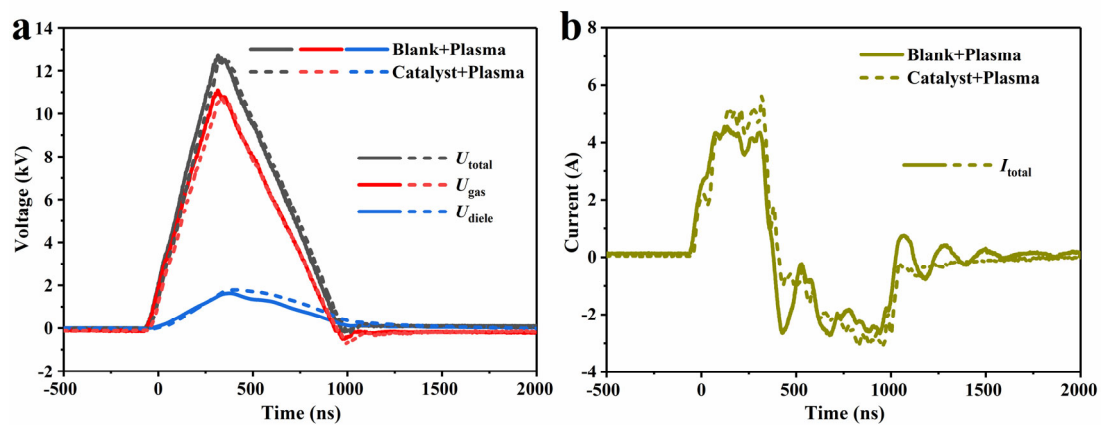

**Figure S1.** (a) Typical voltage waveforms and (b) typical current waveforms over the 0.5Pd/CeO<sub>2</sub> catalyst in comparison to that over a blank reactor with plasma at 980 °C (discharge voltage: 13 kV; frequency: 3 kHz; rising time: 300 ns; falling time: 500 ns).

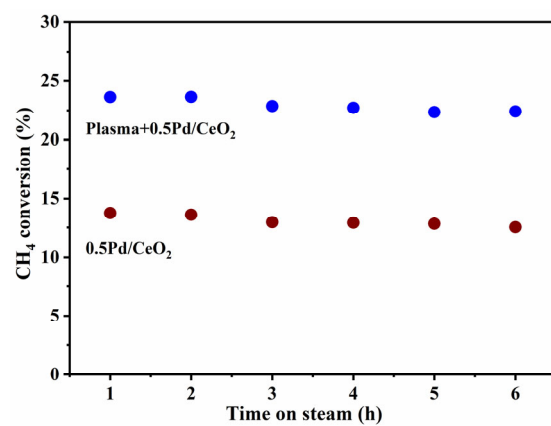

**Figure S2.** The stability of the catalysts at 980 °C under both thermal and plasma conditions for 6 h.

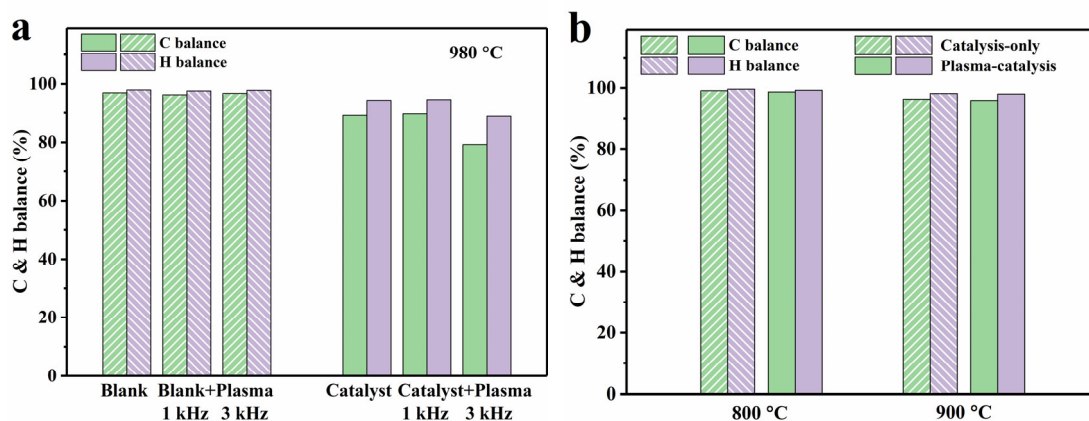

**Figure S3.** (a) C & H balance over the 0.5Pd/CeO<sub>2</sub> catalyst in comparison to that over a blank reactor with or without plasma at 980 °C (discharge voltage: 13 kV; frequency: 1 kHz or 3 kHz; rising time: 300 ns; falling time: 500 ns). (b) C & H balance over the 0.5Pd/CeO<sub>2</sub> catalyst with or without plasma at 800 °C and 900 °C (discharge voltage: 13 kV; frequency: 1 kHz; rising time: 300 ns; falling time: 500 ns).

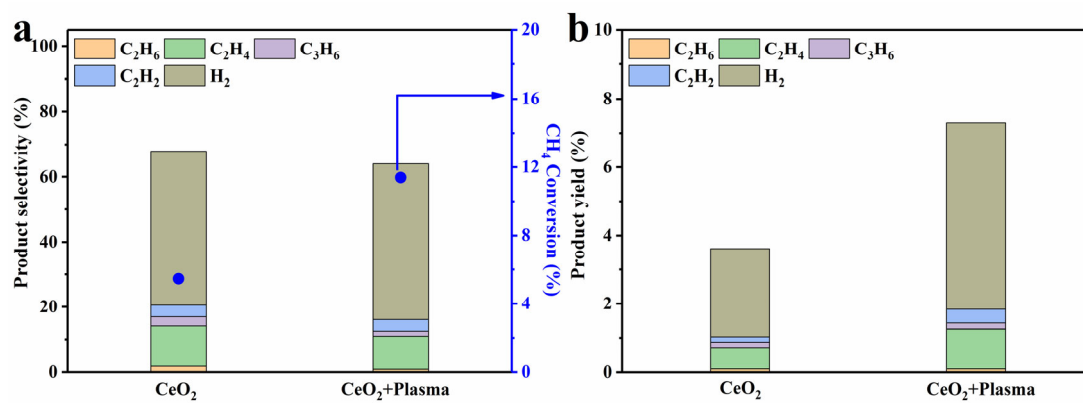

**Figure S4.** (a) Methane conversion, product selectivity and (b) product yield over the CeO<sub>2</sub> support with or without plasma at 980 °C (discharge voltage: 13 kV; frequency: 3 kHz; rising time: 300 ns; falling time: 500 ns).

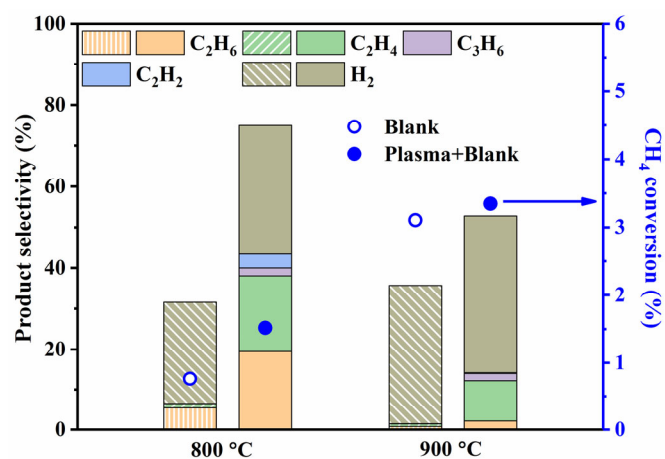

**Figure S5.** Methane conversion and product selectivity over the blank reactor without catalysts in the presence and absence of plasma at different temperatures.

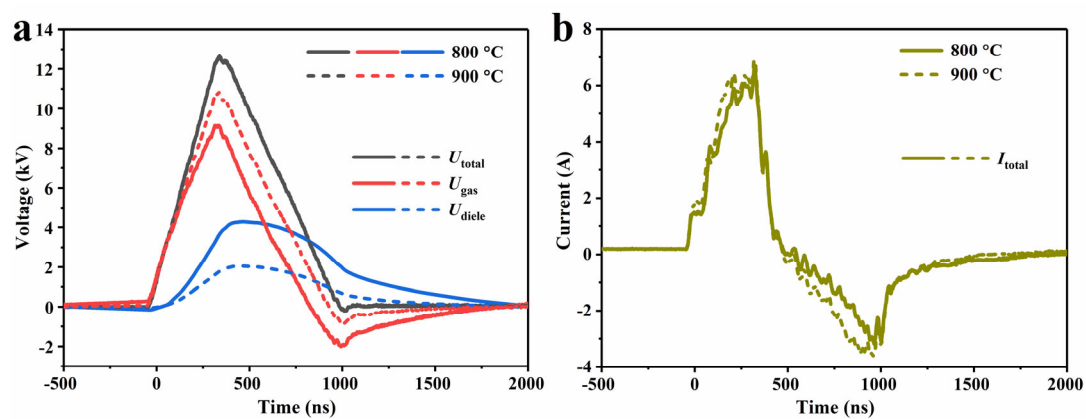

**Figure S6.** (a) Typical voltage waveforms and (b) typical current waveforms over the 0.5Pd/CeO<sub>2</sub> catalyst with plasma at 800 °C and 900 °C (discharge voltage: 13 kV; frequency: 1 kHz; rising time: 300 ns; falling time: 500 ns).

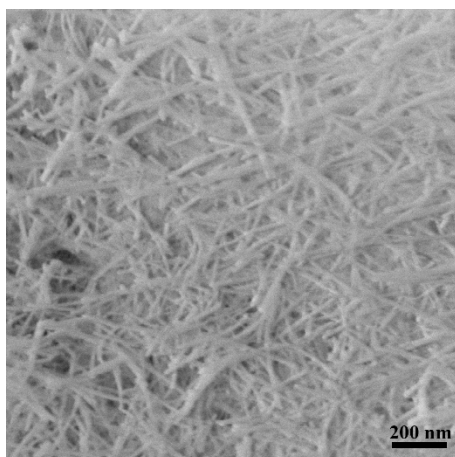

**Figure S7.** SEM image of the CeO<sub>2</sub> support calcined at 400 °C.

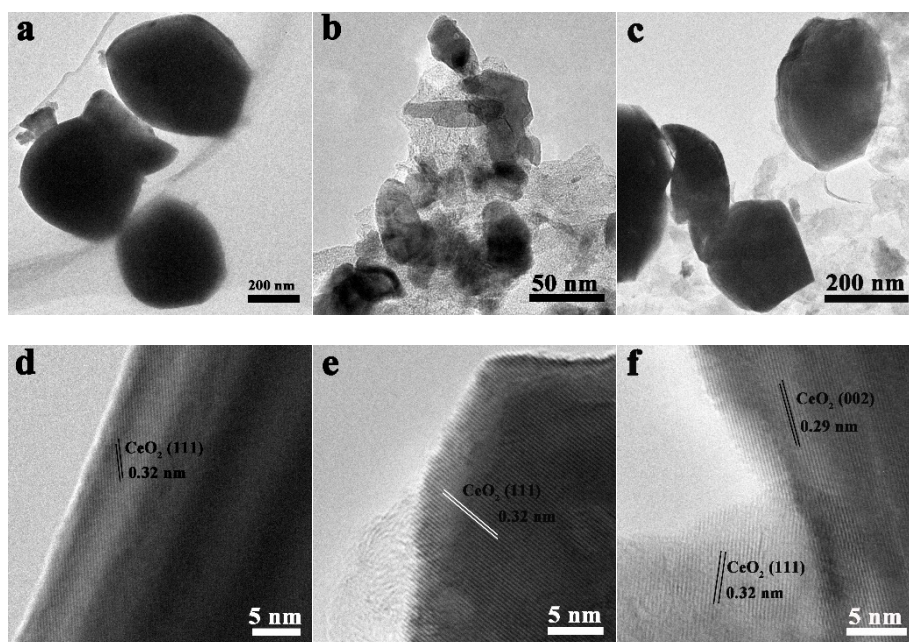

**Figure S8.** (a–c) TEM images, (d–f) HRTEM images for the 0.5Pd/CeO<sub>2</sub> catalysts: (a, d) the fresh catalyst calcined at 980 °C; (b, e) the catalyst after catalysis-only at 980 °C; (c, f) the catalyst after plasma-catalysis at 980 °C.

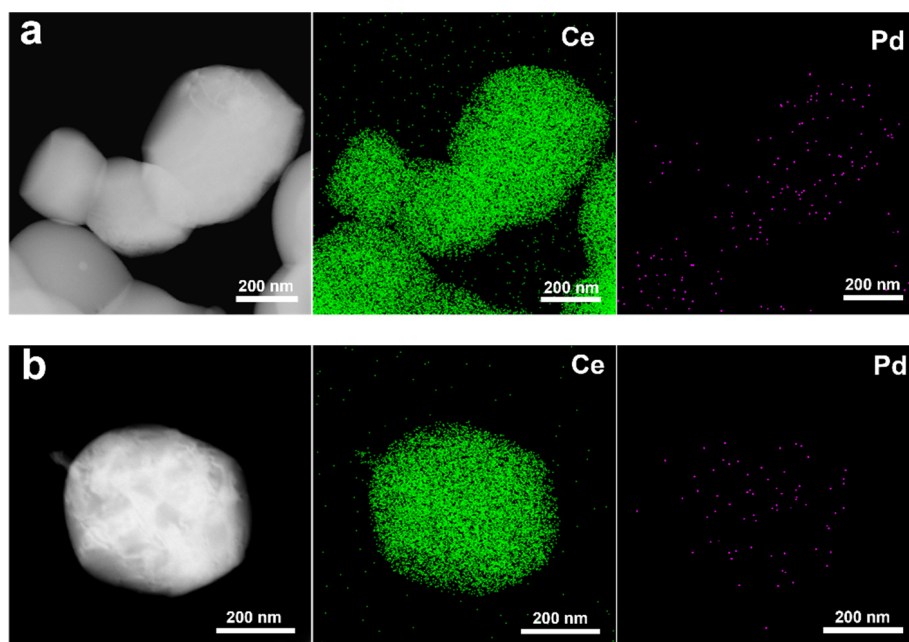

**Figure S9.** HAADF-STEM images and elemental mappings of the catalysts: (a) the fresh 0.5Pd/CeO<sub>2</sub> calcined at 980 °C; (b) the used 0.5Pd/CeO<sub>2</sub> under plasma-catalysis condition at 980 °C.

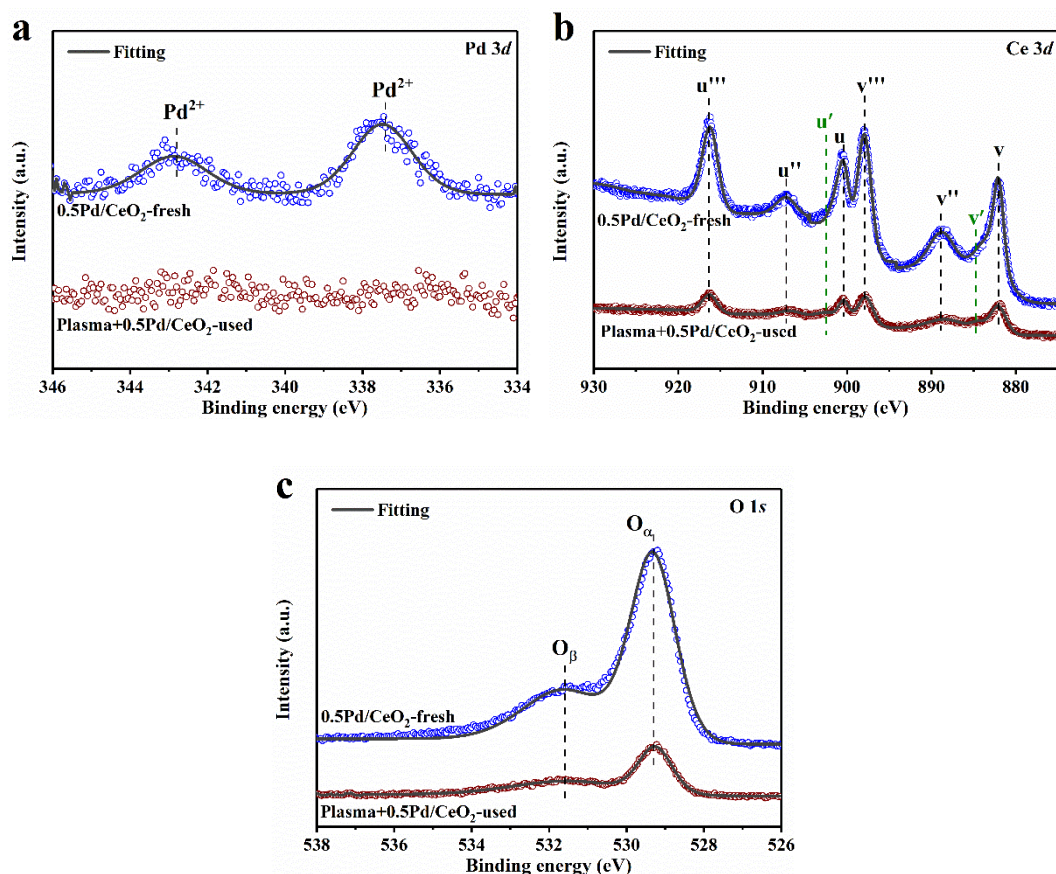

**Figure S10.** XPS spectra of Pd 3d (a), Ce 3d (b) and O 1s (c) for the fresh 0.5Pd/CeO<sub>2</sub> catalyst and the used Plasma+0.5Pd/CeO<sub>2</sub> catalyst.

For the XPS spectrum of Ce 3d (Figure S10b), six peaks denoted as v (882.0 eV), v'' (888.7 eV), v''' (897.9 eV), u (900.3 eV), u'' (907.2 eV), u''' (916.2 eV) were attributed to Ce<sup>4+</sup>.<sup>5, 6</sup> Another two peaks denoted as v' (883.1 eV) and u' (902.4 eV) were assigned to Ce<sup>3+</sup>.<sup>5, 6</sup> For the XPS spectrum of O 1s (Figure S10c), two peaks at 529.7 eV and 531.9 eV were assigned to lattice oxygen (denoted as O<sub>α</sub>) in the ceria and the adsorbed oxygen or oxygen in hydroxyl-like groups (denoted as O<sub>β</sub>) on the catalyst surface,<sup>5, 6</sup> respectively. After the CH<sub>4</sub> conversion, the XPS spectra of Ce 3d and O 1s in intensity were much lower compared with those before the reaction (Figure S10b, c), demonstrating the coverage of carbon species on 0.5Pd/CeO<sub>2</sub>.

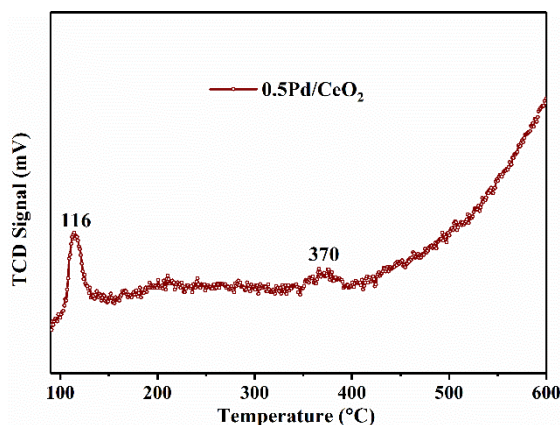

**Figure S11.** H<sub>2</sub>-TPR profile of the fresh 0.5Pd/CeO<sub>2</sub> catalysts.

H<sub>2</sub>-TPR measurement was used to investigate the reducibility of 0.5Pd/CeO<sub>2</sub>. As shown in Figure S11, the first reduction peak (at ca. 116 °C) can be assigned to the reduction of highly dispersed PdO.<sup>7, 8</sup> The reduction peak (at above 300 °C) can be related to the reduction of stable PdO species interacting strongly with CeO<sub>2</sub><sup>7, 8</sup> and the reduction of the oxygen in ceria.<sup>10, 11</sup>

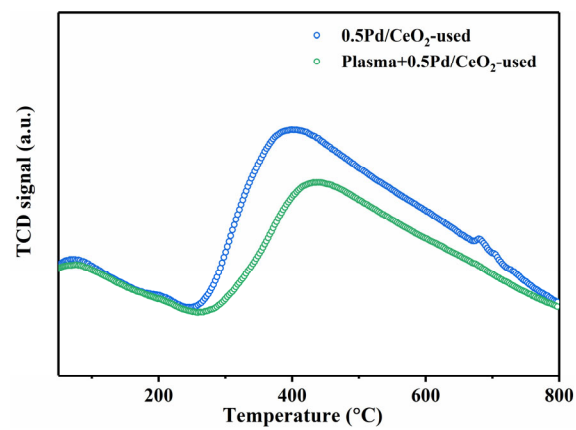

**Figure S12.** O<sub>2</sub>-TPO profiles of the used 0.5Pd/CeO<sub>2</sub> and Plasma+0.5Pd/CeO<sub>2</sub>.

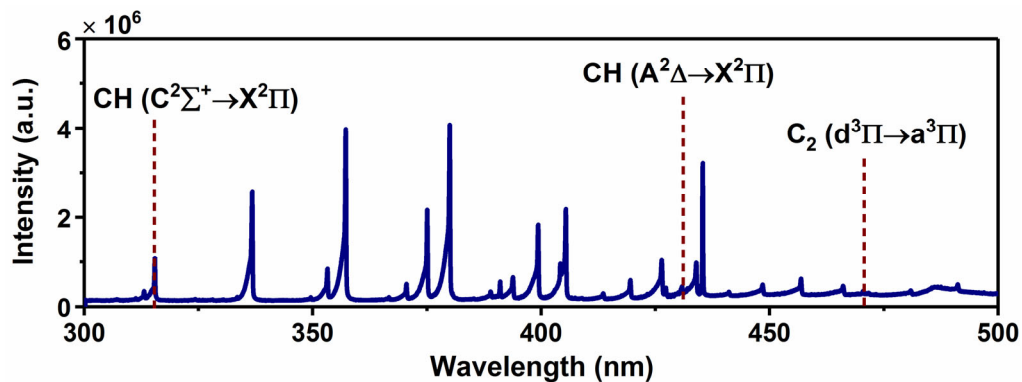

**Figure S13.** Typical optical emission spectra during the conversion of CH<sub>4</sub> under the plasma-catalysis condition.

The OES measurement was used to detect the active species during the plasma-catalysis conditions. Two peaks at 315.5 nm and 431.0 nm were assigned to the vibrational-rotational bands of CH ( $C^2\Sigma^+ \rightarrow X^2\Pi$ ) and CH ( $A^2\Delta \rightarrow X^2\Pi$ ),<sup>12, 13</sup> respectively. The peak at 471.5 nm was attributed to the C<sub>2</sub> ( $d^3\Pi \rightarrow a^3\Pi$ ) bands.<sup>12, 13</sup>

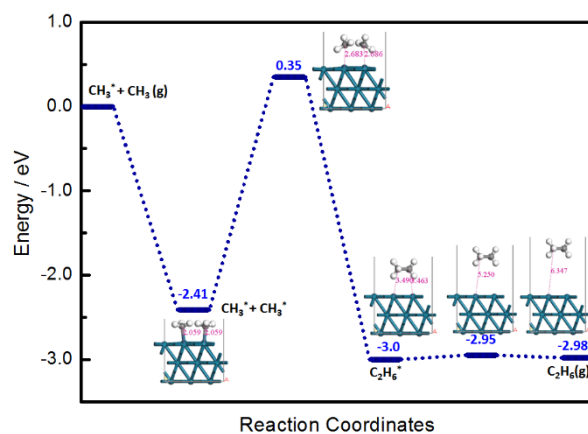

**Figure S14.** The DFT simulations of the CH<sub>3</sub> radicals reacting with the adsorbed CH<sub>3</sub> on Pd-site.

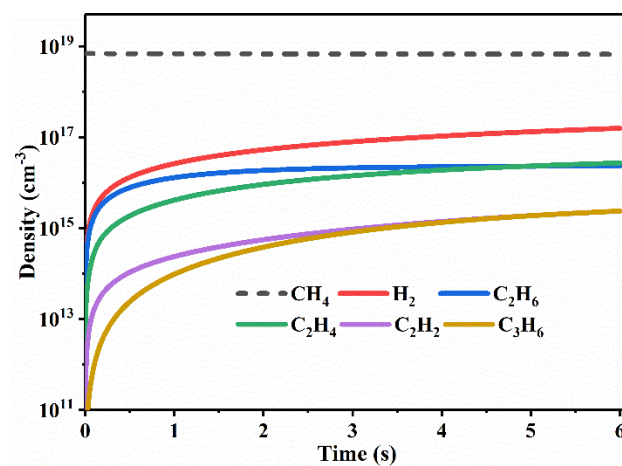

**Figure S15.** The density of the CH<sub>4</sub> and main products as a function of time for the CH<sub>4</sub> conversion assisted by plasma without catalyst.

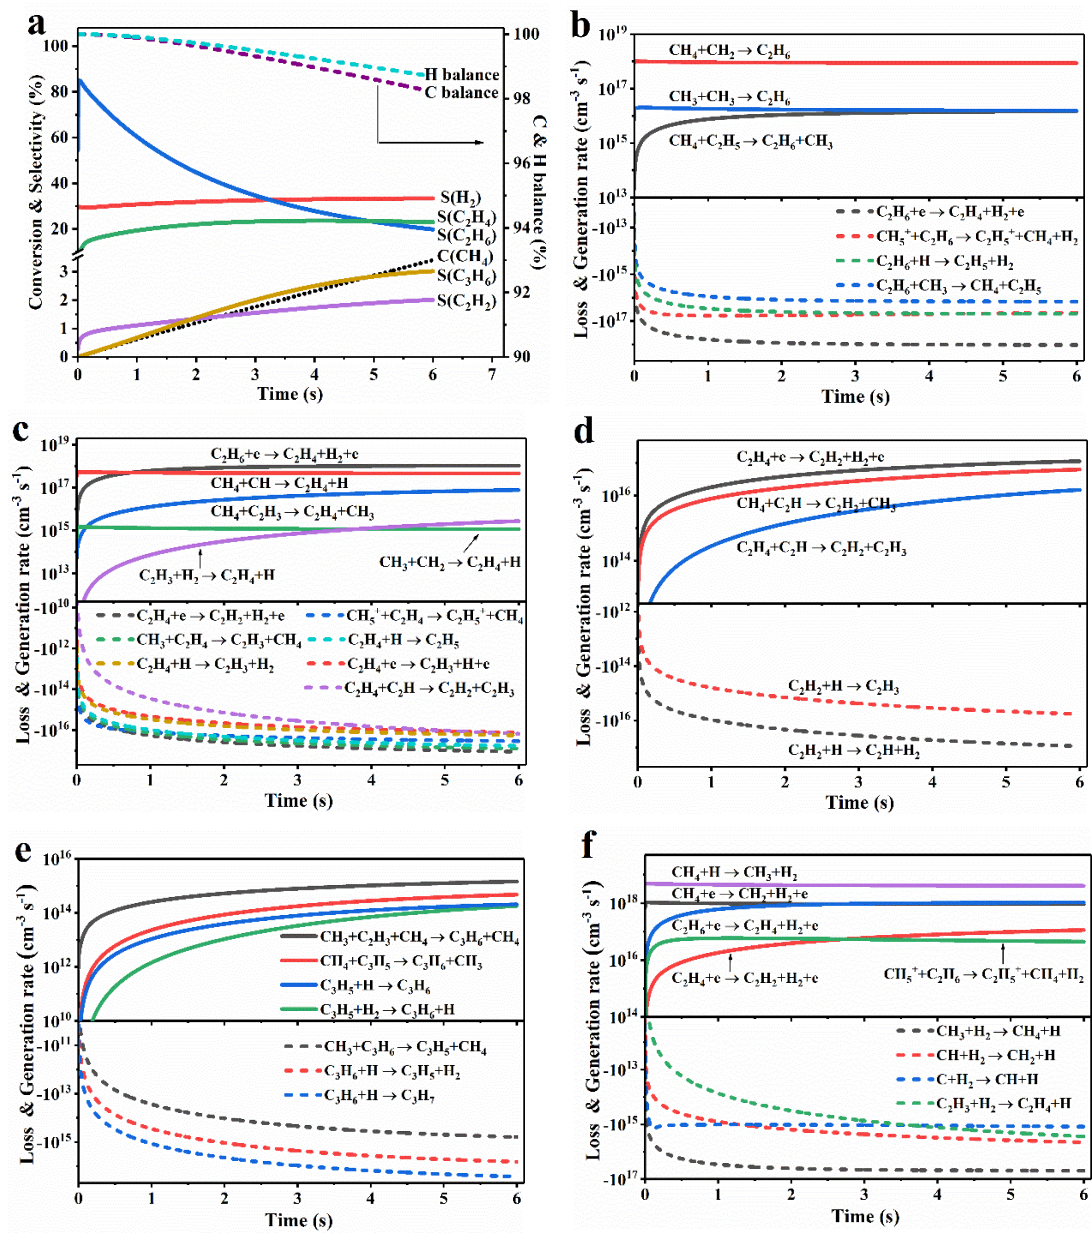

**Figure S16.** (a) CH<sub>4</sub> conversion, selectivity of major products and C & H balance as a function of time for the CH<sub>4</sub> conversion assisted by plasma without catalyst. (b–f) Generation and loss rates of the products as a function of time for the CH<sub>4</sub> conversion: (b) C<sub>2</sub>H<sub>6</sub>, (c) C<sub>2</sub>H<sub>4</sub>, (d) C<sub>2</sub>H<sub>2</sub>, (e) C<sub>3</sub>H<sub>6</sub>, (f) H<sub>2</sub>.

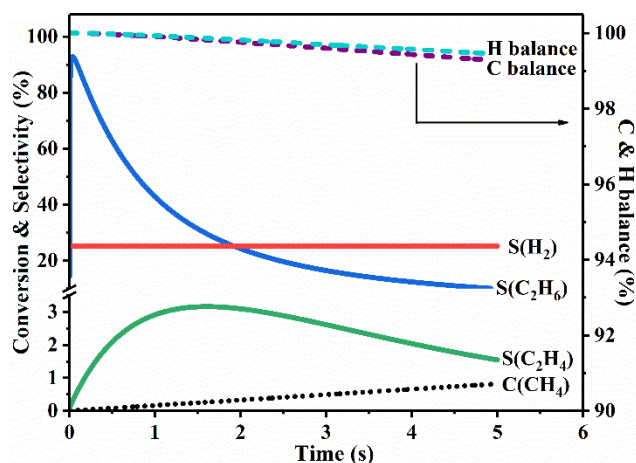

**Figure S17.** CH<sub>4</sub> conversion, selectivity of major products and C & H equilibrium as a function of time for the CH<sub>4</sub> conversion in the blank reactor without catalyst and plasma.

The main formation pathway of C<sub>2</sub>H<sub>6</sub> was  $\text{CH}_3 + \text{CH}_3 \rightarrow \text{C}_2\text{H}_6$  (R41, Table S1) and the main consumption pathway was the continuous generation of the high-carbon alkanes or the polymerization by olefins or alkyne, namely,  $\text{C}_2\text{H}_6 \rightarrow \text{M}$  (R132, Table S1, M is liquid or solid substances). The main generation pathway of C<sub>2</sub>H<sub>4</sub> was  $\text{C}_2\text{H}_3 + \text{CH}_4 \rightarrow \text{CH}_3 + \text{C}_2\text{H}_4$  (R33, Table S1), and the main consumption pathway was its reverse reaction (R46, Table S1). The main reaction pathway to produce H<sub>2</sub> was  $\text{CH}_4 + \text{H} \rightarrow \text{CH}_3 + \text{H}_2$  (R37, Table S1) and the main consumption pathway was also its reverse reaction (R53, Table S1). Similarly, the CH<sub>4</sub> conversion, selectivity of major products and C & H balance at 4.8 s was calculated and compared with the experimental results (Table S5), verifying the reliability of the CH<sub>4</sub> thermal cracking model.

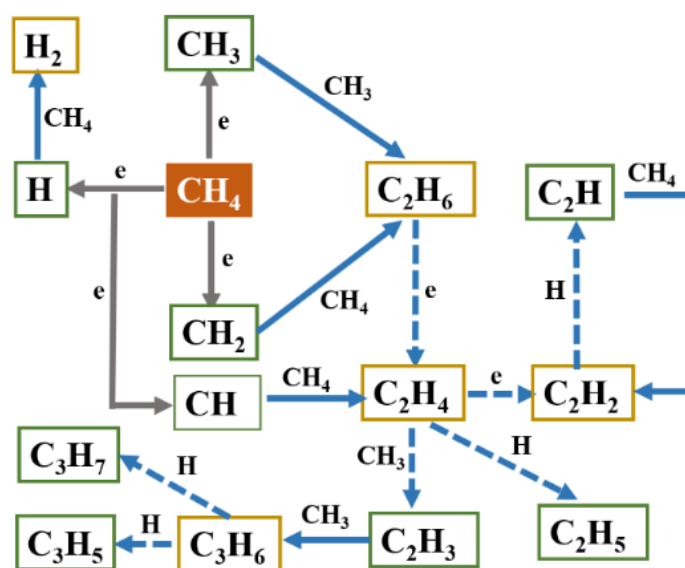

**Figure S18.** Possible reaction pathways for the  $\text{CH}_4$  conversion assisted by plasma without catalyst.

**Table S1.** Plasma chemistry involved in this model.

| No.                                                  | Reaction                                                                                             | Rate coefficient <sup>a</sup>                              | Reference |
|------------------------------------------------------|------------------------------------------------------------------------------------------------------|------------------------------------------------------------|-----------|
| <b><i>Electron-neutral reactions<sup>b</sup></i></b> |                                                                                                      |                                                            |           |
| R1                                                   | $\text{CH}_4 + \text{e} \rightarrow \text{CH}_3 + \text{H} + \text{e}$                               | Bolsig+                                                    | 14        |
| R2                                                   | $\text{CH}_4 + \text{e} \rightarrow \text{CH}_2 + \text{H}_2 + \text{e}$                             | Bolsig+                                                    | 14        |
| R3                                                   | $\text{CH}_4 + \text{e} \rightarrow \text{CH} + 3\text{H} + \text{e}$                                | Bolsig+                                                    | 14        |
| R4                                                   | $\text{CH}_4 + \text{e} \rightarrow \text{C} + 4\text{H} + \text{e}$                                 | Bolsig+                                                    | 14        |
| R5                                                   | $\text{CH}_4 + \text{e} \rightarrow \text{CH}_4^+ + 2\text{e}$                                       | Bolsig+                                                    | 14        |
| R6                                                   | $\text{CH}_4 + \text{e} \rightarrow \text{CH}_3^+ + \text{H} + 2\text{e}$                            | Bolsig+                                                    | 14        |
| R7                                                   | $\text{C}_2\text{H}_4 + \text{e} \rightarrow \text{C}_2\text{H}_2 + \text{H}_2 + \text{e}$           | Bolsig+                                                    | 15        |
| R8                                                   | $\text{C}_2\text{H}_4 + \text{e} \rightarrow \text{C}_2\text{H}_3 + \text{H} + \text{e}$             | Bolsig+                                                    | 15        |
| R9                                                   | $\text{C}_2\text{H}_6 + \text{e} \rightarrow \text{C}_2\text{H}_5 + \text{H} + \text{e}$             | Bolsig+                                                    | 15        |
| R10                                                  | $\text{C}_2\text{H}_6 + \text{e} \rightarrow \text{C}_2\text{H}_4 + \text{H}_2 + \text{e}$           | Bolsig+                                                    | 15        |
| R11                                                  | $\text{C}_3\text{H}_6 + \text{e} \rightarrow \text{C}_2\text{H}_2 + \text{CH}_4 + \text{e}$          | Bolsig+                                                    | 15        |
| R12                                                  | $\text{C}_3\text{H}_8 + \text{e} \rightarrow \text{C}_3\text{H}_6 + \text{H}_2 + \text{e}$           | Bolsig+                                                    | 15        |
| R13                                                  | $\text{C}_3\text{H}_8 + \text{e} \rightarrow \text{C}_2\text{H}_4 + \text{CH}_4 + \text{e}$          | Bolsig+                                                    | 15        |
| <b><i>Electron-ion reactions</i></b>                 |                                                                                                      |                                                            |           |
| R14                                                  | $\text{CH}_5^+ + \text{e} \rightarrow \text{CH}_3 + 2\text{H}$                                       | $2.57 \times 10^{-7} \times (300/T_g)^{0.3}$               | 16        |
| R15                                                  | $\text{CH}_5^+ + \text{e} \rightarrow \text{CH}_2 + \text{H}_2 + \text{H}$                           | $6.61 \times 10^{-8} \times (300/T_g)^{0.3}$               | 16        |
| R16                                                  | $\text{CH}_4^+ + \text{e} \rightarrow \text{CH}_3 + \text{H}$                                        | $1.18 \times 10^{-8} \times (300/T_g)^{0.5}$               | 16        |
| R17                                                  | $\text{CH}_4^+ + \text{e} \rightarrow \text{CH}_2 + 2\text{H}$                                       | $2.42 \times 10^{-8} \times (300/T_g)^{0.5}$               | 16        |
| R18                                                  | $\text{CH}_4^+ + \text{e} \rightarrow \text{CH} + \text{H}_2 + \text{H}$                             | $1.41 \times 10^{-8} \times (300/T_g)^{0.5}$               | 14        |
| R19                                                  | $\text{CH}_3^+ + \text{e} \rightarrow \text{CH}_2 + \text{H}$                                        | $2.25 \times 10^{-8} \times (300/T_g)^{0.5}$               | 16        |
| R20                                                  | $\text{CH}_3^+ + \text{e} \rightarrow \text{CH} + \text{H}_2$                                        | $7.88 \times 10^{-9} \times (300/T_g)^{0.5}$               | 16        |
| R21                                                  | $\text{CH}_3^+ + \text{e} \rightarrow \text{CH} + 2\text{H}$                                         | $9 \times 10^{-9} \times (300/T_g)^{0.5}$                  | 16        |
| R22                                                  | $\text{CH}_3^+ + \text{e} \rightarrow \text{C} + \text{H}_2 + \text{H}$                              | $1.69 \times 10^{-8} \times (300/T_g)^{0.5}$               | 16        |
| R23                                                  | $\text{C}_2\text{H}_5^+ + \text{e} \rightarrow \text{C}_2\text{H}_3 + 2\text{H}$                     | $1.92 \times 10^{-8} \times (300/T_g)^{0.71}$              | 15        |
| R24                                                  | $\text{C}_2\text{H}_5^+ + \text{e} \rightarrow \text{C}_2\text{H}_2 + 3\text{H}$                     | $8.98 \times 10^{-9} \times (300/T_g)^{0.71}$              | 15        |
| R25                                                  | $\text{C}_2\text{H}_5^+ + \text{e} \rightarrow \text{C}_2\text{H}_2 + \text{H}_2 + \text{H}$         | $1.6 \times 10^{-8} \times (300/T_g)^{0.71}$               | 15        |
| <b><i>Ion-neutral reactions</i></b>                  |                                                                                                      |                                                            |           |
| R26                                                  | $\text{CH}_4^+ + \text{CH}_4 \rightarrow \text{CH}_5^+ + \text{CH}_3$                                | $1.5 \times 10^{-9}$                                       | 16        |
| R27                                                  | $\text{CH}_3^+ + \text{CH}_4 \rightarrow \text{C}_2\text{H}_5^+ + \text{H}_2$                        | $1.2 \times 10^{-9}$                                       | 16        |
| R28                                                  | $\text{CH}_5^+ + \text{C}_2\text{H}_4 \rightarrow \text{C}_2\text{H}_5^+ + \text{CH}_4$              | $1.5 \times 10^{-9}$                                       | 16        |
| R29                                                  | $\text{CH}_5^+ + \text{C}_2\text{H}_6 \rightarrow \text{C}_2\text{H}_5^+ + \text{CH}_4 + \text{H}_2$ | $2.25 \times 10^{-10}$                                     | 16        |
| <b><i>Neutral-neutral reactions (b)</i></b>          |                                                                                                      |                                                            |           |
| R30                                                  | $\text{CH}_4 + \text{CH}_2 \rightarrow \text{CH}_3 + \text{CH}_3$                                    | $4.08 \times 10^{-18} T_g^2 \exp(-4163/T_g)$               | 16        |
| R31                                                  | $\text{CH}_4 + \text{CH} \rightarrow \text{C}_2\text{H}_4 + \text{H}$                                | $9.97 \times 10^{-11}$                                     | 16        |
| R32                                                  | $\text{CH}_4 + \text{C}_2\text{H}_5 \rightarrow \text{C}_2\text{H}_6 + \text{CH}_3$                  | $2.51 \times 10^{-15} (T_g/298)^{4.14} \exp(-52.55/R/T_g)$ | 16        |
| R33                                                  | $\text{CH}_4 + \text{C}_2\text{H}_3 \rightarrow \text{C}_2\text{H}_4 + \text{CH}_3$                  | $4.26 \times 10^{-15} (T_g/298)^{4.02} \exp(-22.86/R/T_g)$ | 16        |
| R34                                                  | $\text{CH}_4 + \text{C}_2\text{H} \rightarrow \text{C}_2\text{H}_2 + \text{CH}_3$                    | $3.01 \times 10^{-12} \exp(-2.08/R/T_g)$                   | 16        |
| R35                                                  | $\text{CH}_4 + \text{C}_3\text{H}_7 \rightarrow \text{C}_3\text{H}_8 + \text{CH}_3$                  | $3.54 \times 10^{-16} (T_g/298)^{4.02} \exp(-45.48/R/T_g)$ | 16        |
| R36                                                  | $\text{CH}_4 + \text{C}_3\text{H}_5 \rightarrow \text{C}_3\text{H}_6 + \text{CH}_3$                  | $1.71 \times 10^{-14} (T_g/298)^{3.4} \exp(-97.28/R/T_g)$  | 16        |
| R37                                                  | $\text{CH}_4 + \text{H} \rightarrow \text{CH}_3 + \text{H}_2$                                        | $9.86 \times 10^{-13} (T_g/298)^3 \exp(-36.67/R/T_g)$      | 16        |

|     |                                                                                                       |                                                            |    |
|-----|-------------------------------------------------------------------------------------------------------|------------------------------------------------------------|----|
| R38 | $\text{CH}_4 + \text{CH}_3 \rightarrow \text{H} + \text{C}_2\text{H}_6$                               | $1.33 \times 10^{-10} \exp(-167/R/T_g)$                    | 16 |
| R39 | $\text{CH}_4 + \text{CH}_2 \rightarrow \text{C}_2\text{H}_6$                                          | $1.9 \times 10^{-12}$                                      | 16 |
| R40 | $\text{CH}_3 + \text{CH}_3 \rightarrow \text{C}_2\text{H}_5 + \text{H}$                               | $5 \times 10^{-11} \exp(-56.54/R/T_g)$                     | 16 |
| R41 | $\text{CH}_3 + \text{CH}_3 \rightarrow \text{C}_2\text{H}_6$                                          | $1.12 \times 10^{-7} T_g^{-1.18} \exp(-329.14/T_g)$        | 16 |
| R42 | $\text{CH}_3 + \text{CH}_2 \rightarrow \text{C}_2\text{H}_4 + \text{H}$                               | $7.1 \times 10^{-11}$                                      | 16 |
| R43 | $\text{CH}_3 + \text{C}_2\text{H}_6 \rightarrow \text{C}_2\text{H}_5 + \text{CH}_4$                   | $7.19 \times 10^{-15} (T_g/298)^4 \exp(-34.67/R/T_g)$      | 16 |
| R44 | $\text{CH}_3 + \text{C}_2\text{H}_5 \rightarrow \text{C}_2\text{H}_4 + \text{CH}_4$                   | $1.91 \times 10^{-12}$                                     | 16 |
| R45 | $\text{CH}_3 + \text{C}_2\text{H}_5 \rightarrow \text{C}_3\text{H}_8$                                 | $1.56 \times 10^{-11}$                                     | 16 |
| R46 | $\text{CH}_3 + \text{C}_2\text{H}_4 \rightarrow \text{C}_2\text{H}_3 + \text{CH}_4$                   | $2.18 \times 10^{-11} \exp(-46.56/R/T_g)$                  | 16 |
| R47 | $\text{CH}_3 + \text{C}_2\text{H}_3 \rightarrow \text{C}_2\text{H}_2 + \text{CH}_4$                   | $1.5 \times 10^{-11} \exp(3.2/R/T_g)$                      | 16 |
| R48 | $\text{CH}_3 + \text{C}_2\text{H}_3 + \text{CH}_4 \rightarrow \text{C}_3\text{H}_6 + \text{CH}_4$     | $3.8 \times 10^{-29}$                                      | 16 |
| R49 | $\text{CH}_3 + \text{C}_2\text{H}_2 \rightarrow \text{CH}_4 + \text{C}_2\text{H}$                     | $3 \times 10^{-13} \exp(-72.34/R/T_g)$                     | 16 |
| R50 | $\text{CH}_3 + \text{C}_3\text{H}_8 \rightarrow \text{C}_3\text{H}_7 + \text{CH}_4$                   | $1.5 \times 10^{-24} T_g^{3.65} \exp(-3600.4/T_g)$         | 16 |
| R51 | $\text{CH}_3 + \text{C}_3\text{H}_7 \rightarrow \text{C}_3\text{H}_6 + \text{CH}_4$                   | $3.07 \times 10^{-12} (T_g/298)^{-0.32}$                   | 16 |
| R52 | $\text{CH}_3 + \text{C}_3\text{H}_6 \rightarrow \text{C}_3\text{H}_5 + \text{CH}_4$                   | $1.68 \times 10^{-15} (T_g/298)^{3.5} \exp(-23.78/R/T_g)$  | 16 |
| R53 | $\text{CH}_3 + \text{H}_2 \rightarrow \text{CH}_4 + \text{H}$                                         | $2.52 \times 10^{-14} (T_g/298)^{3.12} \exp(-36.42/R/T_g)$ | 16 |
| R54 | $\text{CH}_3 + \text{H} \rightarrow \text{CH}_2 + \text{H}_2$                                         | $1 \times 10^{-10} \exp(-63.19/R/T_g)$                     | 16 |
| R55 | $\text{CH}_3 + \text{H} \rightarrow \text{CH}_4$                                                      | $2.31 \times 10^{-8} T_g^{-0.534} \exp(-269.75/T_g)$       | 16 |
| R56 | $\text{CH}_2 + \text{CH}_2 \rightarrow \text{C}_2\text{H}_2 + 2\text{H}$                              | $3.32 \times 10^{-10} \exp(-45.98/R/T_g)$                  | 16 |
| R57 | $\text{CH}_2 + \text{C}_2\text{H}_5 \rightarrow \text{C}_2\text{H}_4 + \text{CH}_3$                   | $3.01 \times 10^{-11}$                                     | 16 |
| R58 | $\text{CH}_2 + \text{C}_2\text{H}_3 \rightarrow \text{C}_2\text{H}_2 + \text{CH}_3$                   | $3.01 \times 10^{-11}$                                     | 16 |
| R59 | $\text{CH}_2 + \text{C}_2\text{H} \rightarrow \text{C}_2\text{H}_2 + \text{CH}$                       | $3.01 \times 10^{-11}$                                     | 16 |
| R60 | $\text{CH}_2 + \text{C}_3\text{H}_8 \rightarrow \text{C}_3\text{H}_7 + \text{CH}_3$                   | $1.61 \times 10^{-15} (T_g/298)^{3.65} \exp(-29.93/R/T_g)$ | 16 |
| R61 | $\text{CH}_2 + \text{C}_3\text{H}_7 \rightarrow \text{C}_2\text{H}_4 + \text{C}_2\text{H}_5$          | $3.01 \times 10^{-11}$                                     | 16 |
| R62 | $\text{CH}_2 + \text{C}_3\text{H}_7 \rightarrow \text{C}_3\text{H}_6 + \text{CH}_3$                   | $3.01 \times 10^{-11}$                                     | 16 |
| R63 | $\text{CH}_2 + \text{C}_3\text{H}_6 \rightarrow \text{C}_3\text{H}_5 + \text{CH}_3$                   | $1.2 \times 10^{-12} \exp(-25.94/R/T_g)$                   | 16 |
| R64 | $\text{CH}_2 + \text{H}_2 \rightarrow \text{CH}_3 + \text{H}$                                         | $8.3 \times 10^{-19} T_g^2 \exp(-3938.65/T_g)$             | 16 |
| R65 | $\text{CH}_2 + \text{H} \rightarrow \text{CH} + \text{H}_2$                                           | $1 \times 10^{-11} \exp(7.48/R/T_g)$                       | 16 |
| R66 | $\text{CH} + \text{C}_2\text{H}_6 + \text{CH}_4 \rightarrow \text{C}_3\text{H}_7 + \text{CH}_4$       | $1.14 \times 10^{-29}$                                     | 16 |
| R67 | $\text{CH} + \text{H}_2 \rightarrow \text{CH}_2 + \text{H}$                                           | $1.79 \times 10^{-10} \exp(-1565.17/T_g)$                  | 16 |
| R68 | $\text{CH} + \text{H} \rightarrow \text{C} + \text{H}_2$                                              | $4.98 \times 10^{-11}$                                     | 16 |
| R69 | $\text{CH} + \text{CH}_3 \rightarrow \text{C}_2\text{H}_3 + \text{H}$                                 | $4.98 \times 10^{-11}$                                     | 16 |
| R70 | $\text{CH} + \text{CH}_2 \rightarrow \text{C}_2\text{H}_2 + \text{H}$                                 | $6.64 \times 10^{-11}$                                     | 16 |
| R71 | $\text{CH} + \text{C}_2\text{H}_3 \rightarrow \text{CH}_2 + \text{C}_2\text{H}_2$                     | $8.3 \times 10^{-11}$                                      | 16 |
| R72 | $\text{C} + \text{H}_2 \rightarrow \text{CH} + \text{H}$                                              | $6.64 \times 10^{-10} \exp(-97.28/R/T_g)$                  | 16 |
| R73 | $\text{C}_2\text{H}_6 + \text{C}_2\text{H}_3 \rightarrow \text{C}_2\text{H}_5 + \text{C}_2\text{H}_4$ | $1.46 \times 10^{-13} (T_g/298)^{3.3} \exp(-43.9/R/T_g)$   | 16 |
| R74 | $\text{C}_2\text{H}_6 + \text{C}_2\text{H} \rightarrow \text{C}_2\text{H}_2 + \text{C}_2\text{H}_5$   | $5.99 \times 10^{-12}$                                     | 16 |
| R75 | $\text{C}_2\text{H}_6 + \text{C}_3\text{H}_7 \rightarrow \text{C}_3\text{H}_8 + \text{C}_2\text{H}_5$ | $1.19 \times 10^{-15} (T_g/298)^{3.82} \exp(-37.83/R/T_g)$ | 16 |
| R76 | $\text{C}_2\text{H}_6 + \text{C}_3\text{H}_5 \rightarrow \text{C}_3\text{H}_6 + \text{C}_2\text{H}_5$ | $5.71 \times 10^{-14} (T_g/298)^{3.3} \exp(-83.06/R/T_g)$  | 16 |
| R77 | $\text{C}_2\text{H}_6 + \text{H} \rightarrow \text{C}_2\text{H}_5 + \text{H}_2$                       | $1.23 \times 10^{-11} (T_g/298)^{1.5} \exp(-31.01/R/T_g)$  | 16 |
| R78 | $2\text{C}_2\text{H}_5 \rightarrow \text{C}_2\text{H}_6 + \text{C}_2\text{H}_4$                       | $2.41 \times 10^{-12}$                                     | 16 |
| R79 | $\text{C}_2\text{H}_5 + \text{C}_2\text{H}_4 \rightarrow \text{C}_2\text{H}_6 + \text{C}_2\text{H}_3$ | $5.83 \times 10^{-14} (T_g/298)^{3.13} \exp(-75.33/R/T_g)$ | 16 |
| R80 | $\text{C}_2\text{H}_5 + \text{C}_2\text{H}_2 \rightarrow \text{C}_2\text{H}_6 + \text{C}_2\text{H}$   | $4.5 \times 10^{-13} \exp(-98.11/R/T_g)$                   | 16 |

|      |                                                                                                 |                                                                                |    |
|------|-------------------------------------------------------------------------------------------------|--------------------------------------------------------------------------------|----|
| R81  | $\text{C}_2\text{H}_5+\text{C}_2\text{H}\rightarrow\text{C}_2\text{H}_4+\text{C}_2\text{H}_2$   | $3.01\times 10^{-12}$                                                          | 16 |
| R82  | $\text{C}_2\text{H}_5+\text{C}_3\text{H}_8\rightarrow\text{C}_2\text{H}_6+\text{C}_3\text{H}_7$ | $1.61\times 10^{-15} (\text{T}_g/298)^{3.65} \exp(-38.25/\text{R}/\text{T}_g)$ | 16 |
| R83  | $\text{C}_2\text{H}_5+\text{C}_3\text{H}_7\rightarrow\text{C}_3\text{H}_8+\text{C}_2\text{H}_4$ | $1.91\times 10^{-12}$                                                          | 16 |
| R84  | $\text{C}_2\text{H}_5+\text{C}_3\text{H}_7\rightarrow\text{C}_3\text{H}_6+\text{C}_2\text{H}_6$ | $2.41\times 10^{-12}$                                                          | 16 |
| R85  | $\text{C}_2\text{H}_5+\text{C}_3\text{H}_6\rightarrow\text{C}_3\text{H}_5+\text{C}_2\text{H}_6$ | $1.69\times 10^{-15} (\text{T}_g/298)^{3.5} \exp(-35.34/\text{R}/\text{T}_g)$  | 16 |
| R86  | $\text{C}_2\text{H}_5+\text{C}_3\text{H}_5\rightarrow\text{C}_3\text{H}_6+\text{C}_2\text{H}_4$ | $5.36\times 10^{-12}$                                                          | 16 |
| R87  | $\text{C}_2\text{H}_5+\text{H}_2\rightarrow\text{C}_2\text{H}_6+\text{H}$                       | $4.12\times 10^{-15} (\text{T}_g/298)^{3.6} \exp(-27.77/\text{R}/\text{T}_g)$  | 16 |
| R88  | $\text{C}_2\text{H}_5+\text{H}\rightarrow 2\text{CH}_3$                                         | $5.99\times 10^{-11}$                                                          | 16 |
| R89  | $\text{C}_2\text{H}_5+\text{H}\rightarrow\text{C}_2\text{H}_4+\text{H}_2$                       | $3.32\times 10^{-12}$                                                          | 16 |
| R90  | $\text{C}_2\text{H}_5+\text{H}\rightarrow\text{C}_2\text{H}_6$                                  | $8.65\times 10^{-7} \text{T}_g^{-0.99} \exp(-795.17/\text{T}_g)$               | 16 |
| R91  | $\text{C}_2\text{H}_4+\text{C}_2\text{H}\rightarrow\text{C}_2\text{H}_2+\text{C}_2\text{H}_3$   | $1.4\times 10^{-10}$                                                           | 16 |
| R92  | $\text{C}_2\text{H}_4+\text{H}\rightarrow\text{C}_2\text{H}_3+\text{H}_2$                       | $9\times 10^{-10} \exp(-62.36/\text{R}/\text{T}_g)$                            | 16 |
| R93  | $\text{C}_2\text{H}_4+\text{H}\rightarrow\text{C}_2\text{H}_5$                                  | $9.68\times 10^{-12} (\text{T}_g/298)^{1.28} \exp(-5.4/\text{R}/\text{T}_g)$   | 16 |
| R94  | $2\text{C}_2\text{H}_3\rightarrow\text{C}_2\text{H}_4+\text{C}_2\text{H}_2$                     | $3.5\times 10^{-11}$                                                           | 16 |
| R95  | $\text{C}_2\text{H}_3+\text{C}_2\text{H}\rightarrow 2\text{C}_2\text{H}_2$                      | $3.15\times 10^{-11}$                                                          | 16 |
| R96  | $\text{C}_2\text{H}_3+\text{C}_3\text{H}_8\rightarrow\text{C}_2\text{H}_4+\text{C}_3\text{H}_7$ | $1.46\times 10^{-13} (\text{T}_g/298)^{3.3} \exp(-43.9/\text{R}/\text{T}_g)$   | 16 |
| R97  | $\text{C}_2\text{H}_3+\text{C}_3\text{H}_7\rightarrow\text{C}_3\text{H}_8+\text{C}_2\text{H}_2$ | $2.01\times 10^{-12}$                                                          | 16 |
| R98  | $\text{C}_2\text{H}_3+\text{C}_3\text{H}_7\rightarrow\text{C}_3\text{H}_6+\text{C}_2\text{H}_4$ | $2.01\times 10^{-12}$                                                          | 16 |
| R99  | $\text{C}_2\text{H}_3+\text{C}_3\text{H}_6\rightarrow\text{C}_3\text{H}_5+\text{C}_2\text{H}_4$ | $1.68\times 10^{-15} (\text{T}_g/298)^{3.5} \exp(-19.62/\text{R}/\text{T}_g)$  | 16 |
| R100 | $\text{C}_2\text{H}_3+\text{C}_3\text{H}_5\rightarrow\text{C}_3\text{H}_6+\text{C}_2\text{H}_2$ | $8\times 10^{-12}$                                                             | 16 |
| R101 | $\text{C}_2\text{H}_3+\text{H}_2\rightarrow\text{C}_2\text{H}_4+\text{H}$                       | $1.61\times 10^{-13} (\text{T}_g/298)^{2.63} \exp(-35.75/\text{R}/\text{T}_g)$ | 16 |
| R102 | $\text{C}_2\text{H}_3+\text{H}\rightarrow\text{C}_2\text{H}_2+\text{H}_2$                       | $1.6\times 10^{-10}$                                                           | 16 |
| R103 | $\text{C}_2\text{H}_3+\text{H}\rightarrow\text{C}_2\text{H}_4$                                  | $1.01\times 10^{-11} \text{T}_g^{0.27} \exp(-140.92/\text{T}_g)$               | 16 |
| R104 | $\text{C}_2\text{H}_2+\text{H}\rightarrow\text{C}_2\text{H}+\text{H}_2$                         | $1\times 10^{-10} \exp(-93.12/\text{R}/\text{T}_g)$                            | 16 |
| R105 | $\text{C}_2\text{H}_2+\text{H}\rightarrow\text{C}_2\text{H}_3$                                  | $9.3\times 10^{-12} \exp(-1207.85/\text{T}_g)$                                 | 14 |
| R106 | $2\text{C}_2\text{H}\rightarrow\text{C}_2\text{H}_2+\text{C}_2$                                 | $3.01\times 10^{-12}$                                                          | 16 |
| R107 | $\text{C}_2\text{H}+\text{C}_3\text{H}_8\rightarrow\text{C}_2\text{H}_2+\text{C}_3\text{H}_7$   | $5.99\times 10^{-12}$                                                          | 16 |
| R108 | $\text{C}_2\text{H}+\text{C}_3\text{H}_7\rightarrow\text{C}_3\text{H}_6+\text{C}_2\text{H}_2$   | $1\times 10^{-11}$                                                             | 16 |
| R109 | $\text{C}_2\text{H}+\text{C}_3\text{H}_6\rightarrow\text{C}_3\text{H}_5+\text{C}_2\text{H}_2$   | $5.99\times 10^{-12}$                                                          | 16 |
| R110 | $\text{C}_2\text{H}+\text{H}_2\rightarrow\text{C}_2\text{H}_2+\text{H}$                         | $9.43\times 10^{-14} \text{T}_g^{0.9} \exp(-1003.02/\text{R}/\text{T}_g)$      | 16 |
| R111 | $\text{C}_2\text{H}+\text{H}\rightarrow\text{C}_2+\text{H}_2$                                   | $5.99\times 10^{-11} \exp(-118/\text{R}/\text{T}_g)$                           | 16 |
| R112 | $\text{C}_2\text{H}+\text{H}\rightarrow\text{C}_2\text{H}_2$                                    | $1.66\times 10^{-7}$                                                           | 16 |
| R113 | $\text{C}_3\text{H}_8+\text{C}_3\text{H}_5\rightarrow\text{C}_3\text{H}_6+\text{C}_3\text{H}_7$ | $5.71\times 10^{-14} (\text{T}_g/298)^{3.3} \exp(-83.06/\text{R}/\text{T}_g)$  | 16 |
| R114 | $\text{C}_3\text{H}_8+\text{H}\rightarrow\text{C}_3\text{H}_7+\text{H}_2$                       | $2.19\times 10^{-18} \text{T}_g^{2.54} \exp(-3400.1/\text{T}_g)$               | 16 |
| R115 | $\text{C}_3\text{H}_7+\text{C}_3\text{H}_7\rightarrow\text{C}_3\text{H}_6+\text{C}_3\text{H}_8$ | $2.81\times 10^{-12}$                                                          | 16 |
| R116 | $\text{C}_3\text{H}_7+\text{C}_3\text{H}_6\rightarrow\text{C}_3\text{H}_5+\text{C}_3\text{H}_8$ | $1.69\times 10^{-15} (\text{T}_g/298)^{3.5} \exp(-27.77/\text{R}/\text{T}_g)$  | 16 |
| R117 | $\text{C}_3\text{H}_7+\text{C}_3\text{H}_5\rightarrow\text{C}_3\text{H}_6+\text{C}_3\text{H}_6$ | $2.41\times 10^{-12} \exp(-0.55/\text{R}/\text{T}_g)$                          | 16 |
| R118 | $\text{C}_3\text{H}_7+\text{H}_2\rightarrow\text{C}_3\text{H}_8+\text{H}$                       | $3.19\times 10^{-14} (\text{T}_g/298)^{2.84} \exp(-38.25/\text{R}/\text{T}_g)$ | 16 |
| R119 | $\text{C}_3\text{H}_7+\text{H}\rightarrow\text{C}_3\text{H}_6+\text{H}_2$                       | $3.01\times 10^{-12}$                                                          | 16 |
| R120 | $\text{C}_3\text{H}_7+\text{H}\rightarrow\text{C}_3\text{H}_8$                                  | $6\times 10^{-11}$                                                             | 16 |
| R121 | $\text{C}_3\text{H}_6+\text{H}\rightarrow\text{C}_3\text{H}_5+\text{H}_2$                       | $4.4\times 10^{-13} (\text{T}_g/298)^{2.5} \exp(-10.39/\text{R}/\text{T}_g)$   | 16 |
| R122 | $\text{C}_3\text{H}_6+\text{H}\rightarrow\text{C}_3\text{H}_7$                                  | $1.29\times 10^{-11} (\text{T}_g/298)^{0.51} \exp(-5.15/\text{R}/\text{T}_g)$  | 16 |
| R123 | $\text{C}_3\text{H}_5+\text{H}_2\rightarrow\text{C}_3\text{H}_6+\text{H}$                       | $1.39\times 10^{-13} (\text{T}_g/298)^{2.38} \exp(-79.49/\text{R}/\text{T}_g)$ | 16 |

|      |                                                                          |                                                                          |    |
|------|--------------------------------------------------------------------------|--------------------------------------------------------------------------|----|
| R124 | $\text{C}_3\text{H}_5 + \text{H} \rightarrow \text{C}_3\text{H}_6$       | $78.8 \times (\text{T}_g/298)^{-11.76} \exp(-98.53/\text{R}/\text{T}_g)$ | 16 |
| R125 | $\text{H} + \text{H} + \text{CH}_4 \rightarrow \text{H}_2 + \text{CH}_4$ | $5.52 \times 10^{-30} \text{T}_g^{-1}$                                   | 16 |
| R126 | $\text{CH}_4 \rightarrow \text{CH}_3 + \text{H}$                         | $7.5 \times 10^{-7} \exp(-380/\text{R}/\text{T}_g)$                      | 16 |
| R127 | $\text{CH}_3 \rightarrow \text{CH}_2 + \text{H}$                         | $1.7 \times 10^{-8} \exp(-379/\text{R}/\text{T}_g)$                      | 16 |
| R128 | $\text{CH}_3 \rightarrow \text{CH} + \text{H}_2$                         | $1.66 \times 10^{-8} \exp(-357/\text{R}/\text{T}_g)$                     | 14 |
| R129 | $\text{CH}_2 \rightarrow \text{CH} + \text{H}$                           | $2.66 \times 10^{-10} \exp(-268/\text{R}/\text{T}_g)$                    | 16 |
| R130 | $\text{CH}_2 \rightarrow \text{C} + \text{H}_2$                          | $9.33 \times 10^{-9} \exp(-375/\text{R}/\text{T}_g)$                     | 16 |
| R131 | $\text{CH} \rightarrow \text{C} + \text{H}$                              | $3.16 \times 10^{-10} \exp(-280/\text{R}/\text{T}_g)$                    | 16 |
| R132 | $\text{C}_2\text{H}_6 \rightarrow \text{M}^c$                            | 0.5                                                                      | —  |

<sup>a</sup> Rate coefficient are given in  $\text{s}^{-1}$ ,  $\text{cm}^3 \text{s}^{-1}$ , and  $\text{cm}^6 \text{s}^{-1}$  for unimolecular, two-body, and three-body reactions, respectively.

<sup>b</sup> Gas temperature  $\text{T}_g$  is given in K.  $R$  is the gas constant ( $8.314 \times 10^{-3} \text{ kJ mol}^{-1} \text{ K}^{-1}$ ).

<sup>c</sup> M represents the non-gas phase products. The reaction is actually a simplification of a series of processes that produce high-carbon hydrocarbons. The rate is assumed based on the experimental results.

**Table S2.** Comparison of CH<sub>4</sub> conversion and C<sub>2</sub> products selectivity over various catalysts for the nonoxidative conversion of CH<sub>4</sub>.

| Catalysts                                  | Metal loading (wt.%) | Temperature (°C) | GHSV (CH <sub>4</sub> cm <sup>3</sup> g <sup>-1</sup> h <sup>-1</sup> ) | CH <sub>4</sub> conversion (%) | C <sub>2</sub> selectivity (%) <sup>c</sup> | Reference |
|--------------------------------------------|----------------------|------------------|-------------------------------------------------------------------------|--------------------------------|---------------------------------------------|-----------|
| Plasma+0.5Pd/CeO <sub>2</sub> <sup>a</sup> | 0.5                  | 800              | 9,800                                                                   | 2.7                            | 47.4                                        | This work |
| Plasma+0.5Pd/CeO <sub>2</sub> <sup>a</sup> | 0.5                  | 900              | 9,800                                                                   | 5.2                            | 18.0                                        | This work |
| Plasma+0.5Pd/CeO <sub>2</sub> <sup>b</sup> | 0.5                  | 980              | 9,800                                                                   | 23.6                           | 10.8                                        | This work |
| Fe@SiO <sub>2</sub>                        | 0.5                  | 950              | 4,300                                                                   | 8.1                            | 40.9                                        | 17        |
| Fe@SiO <sub>2</sub>                        | 0.5                  | 980              | 5,900                                                                   | 22                             | ~45                                         | 17        |
| Fe@SiO <sub>2</sub>                        | 0.5                  | 1,090            | 19,200                                                                  | 48.1                           | 52.1                                        | 17        |
| Pt <sub>1</sub> @CeO <sub>2</sub>          | 0.5                  | 900              | 60                                                                      | 7.5                            | 98.4                                        | 18        |
| Pt <sub>1</sub> @CeO <sub>2</sub>          | 0.5                  | 975              | 60                                                                      | 14.4                           | 74.3                                        | 18        |
| Pt <sub>1</sub> @CeO <sub>2</sub>          | 0.5                  | 1,000            | 60                                                                      | 23.1                           | 66.7                                        | 18        |
| Ni-P/SiO <sub>2</sub>                      | 9.2                  | 800              | 12,000                                                                  | 0.02                           | 64.8                                        | 19        |
| Ni-P/SiO <sub>2</sub>                      | 9.2                  | 850              | 12,000                                                                  | 0.08                           | 99.9                                        | 19        |
| Ni-P/SiO <sub>2</sub>                      | 9.2                  | 900              | 12,000                                                                  | 0.51                           | 75.8                                        | 19        |
| Ni-B/SiO <sub>2</sub>                      | 9.2                  | 900              | 6,000                                                                   | 8.8                            | 24                                          | 19        |

<sup>a</sup> The catalyst was assisted by plasma with the frequency of 1 kHz. <sup>b</sup> The catalyst was assisted by plasma with the frequency of 3 kHz. <sup>c</sup> C<sub>2</sub> products consisted of C<sub>2</sub>H<sub>6</sub>, C<sub>2</sub>H<sub>4</sub> and C<sub>2</sub>H<sub>2</sub>.

**Table S3.** The mean crystallite sizes ( $d$ ) of the samples before and after the reaction with or without plasma calculated by Scherrer equation.

| Samples                              | CeO <sub>2</sub> | 0.5Pd/CeO <sub>2</sub> -fresh | 0.5Pd/CeO <sub>2</sub> -used | Plasma+0.5Pd/CeO <sub>2</sub> -used |
|--------------------------------------|------------------|-------------------------------|------------------------------|-------------------------------------|
| $d_{\text{CeO}_2}$ (nm) <sup>a</sup> | 8.8              | 24.9                          | 12.8                         | 20.4                                |

<sup>a</sup> Calculated by the Scherrer equation, applied to the (111) reflection of fluorite CeO<sub>2</sub>.

**Table S4.** The CH<sub>4</sub> conversion, C & H equilibrium and selectivity of major products based on the experiment and kinetic modeling in plasma without catalyst.

|                   | C(CH <sub>4</sub> ) <sup>c</sup> | C<br>balance <sup>d</sup> | H<br>balance <sup>d</sup> | S(C <sub>2</sub> H <sub>6</sub> ) <sup>e</sup> | S(C <sub>2</sub> H <sub>4</sub> ) <sup>e</sup> | S(C <sub>2</sub> H <sub>2</sub> ) <sup>e</sup> | S(C <sub>3</sub> H <sub>6</sub> ) <sup>e</sup> | S(H <sub>2</sub> ) <sup>e</sup> |
|-------------------|----------------------------------|---------------------------|---------------------------|------------------------------------------------|------------------------------------------------|------------------------------------------------|------------------------------------------------|---------------------------------|
| Sim. <sup>a</sup> | 2.8                              | 98.6                      | 99.0                      | 23.5                                           | 23.0                                           | 1.9                                            | 2.8                                            | 33.2                            |
| Exp. <sup>b</sup> | 3                                | 98.3                      | 98.7                      | 19.5                                           | 18.5                                           | 3.4                                            | 1.9                                            | 31.5                            |

<sup>a</sup> Simulation; <sup>b</sup> Experiment; <sup>c</sup> CH<sub>4</sub> conversion, %; <sup>d</sup> %; <sup>e</sup> selectivity of the various products, %.

**Table S5.** The CH<sub>4</sub> conversion, C & H equilibrium and selectivity of major products based on the experiment and kinetic modeling in the blank reactor without catalyst and plasma.

|                   | C(CH <sub>4</sub> ) <sup>c</sup> | C balance <sup>d</sup> | H balance <sup>d</sup> | S(C <sub>2</sub> H <sub>6</sub> ) <sup>e</sup> | S(C <sub>2</sub> H <sub>4</sub> ) <sup>e</sup> | S(H <sub>2</sub> ) <sup>e</sup> |
|-------------------|----------------------------------|------------------------|------------------------|------------------------------------------------|------------------------------------------------|---------------------------------|
| Sim. <sup>a</sup> | 0.79                             | 99.3                   | 99.5                   | 10.2                                           | 1.6                                            | 25.1                            |
| Exp. <sup>b</sup> | 0.76                             | 99.3                   | 99.5                   | 5.4                                            | 1.0                                            | 25.1                            |

<sup>a</sup> Simulation; <sup>b</sup> Experiment; <sup>c</sup> CH<sub>4</sub> conversion, %; <sup>d</sup> %; <sup>e</sup> selectivity of the various products, %.

## References

- 1 H. Mai, L. Sun, Y. Zhang, R. Si, W. Feng, H. Zhang, H. Liu and C. Yan, *J. Phys. Chem. B*, 2005, **109**, 24380–24385.
- 2 H. Jeong, J. Bae, J. W. Han and H. Lee, *ACS Catal.*, 2017, **7**, 7097–7105.
- 3 Y. Gao, L. Dou, S. Zhang, L. Zong, J. Pan, X. Hu, H. Sun, K. Ostrikov and T. Shao, *Chem. Eng. J.* 2021, **420**, 127693.
- 4 Y. Gao, S. Zhang, H. Sun, R. Wang, X. Tu and T. Shao, *Appl. Energ.*, 2018, **226**, 534–545.
- 5 X. Hu, X. Fu, W. Wang, X. Wang, K. Wu, R. Si, C. Ma, C. Jia and C. Yan, *Appl. Catal. B*, 2020, **268**, 118424.
- 6 Z. Hu, X. Liu, D. Meng, Y. Guo, Y. Guo and G. Lu, *ACS Catal.*, 2016, **6**, 2265–2279.
- 7 G. Wang, M. Meng, Y. Zha and T. Ding, *Fuel*, 2010, **89**, 2244–2251.
- 8 G. Ercolino, P. Stelmachowski, G. Grzybek, A. Kotarba and S. Specchia, *Appl. Catal. B*, 2017, 206, 712–725.
- 9 S. Lin, L. Yang, X. Yang and R. Zhou, *Appl. Surf. Sci.*, 2014, **305**, 642–649.
- 10 H. Huang, Q. Dai and X. Wang, *Appl. Catal. B*, 2014, **158–159**, 96–105.
- 11 F. Wang, C. Li, X. Zhang, M. Wei, D. G. Evans and X. Duan, *J. Catal.*, 2015, **329**, 177–186.
- 12 X. Wang, Y. Gao, S. Zhang, H. Sun, J. Li and T. Shao, *Appl. Energ.*, 2019, **243**, 132–144.
- 13 S. Zhang, Y. Gao, H. Sun, H. Bai, R. Wang and T. Shao, *J. Phys. D: Appl. Phys.*, 2018, **51**, 274005.
- 14 R. K. Janev and D. Reiter, *Phys. Plasmas*, 2002, **9**, 4071–4081.
- 15 R. K. Janev and D. Reiter, *Phys. Plasmas*, 2004, **11**, 780–829.
- 16 S. Heijkers, M. Aghaei and A. Bogaerts, *J. Phys. Chem. C*, 2020, **124**, 7016–7030.
- 17 X. Guo, G. Fang, G. Li, H. Ma, H. Fan, L. Yu, C. Ma, X. Wu, D. Deng, M. Wei, D. Tan, R. Si, S. Zhang, J. Li, L. Sun, Z. Tang, X. Pan and X. Bao, *Science*, 2014, **344**, 616–619.
- 18 P. Xie, T. Pu, A. Nie, S. Hwang, S. C. Purdy, W. Yu, D. Su, J. T. Miller and C. Wang, *ACS Catal.*, 2018, **8**, 4044–4048.
- 19 A. L. Dipu, S. Ohbuchi, Y. Nishikawa, S. Iguchi, H. Ogihara and I. Yamanaka, *ACS Catal.*, 2019, **10**, 375–379.
